# Supplementary material for: Coexpression Network Analysis-Based Identification of Critical Genes Differentiating between Latent and Active Tuberculosis
Source: Dis Markers. 2022 Nov 11;2022:2090560. doi: 10.1155/2022/2090560 (PMC9674975; doi:10.1155/2022/2090560)
Supplement: Supplementary 1 — Supplementary file 1: details of GO analyses. [file 2090560.f1.doc]

ONTOLOGY	ID	Description	GeneRatio	BgRatio	pvalue	p.adjust	qvalue	geneID	Count
BP	GO:1903131	mononuclear cell differentiation	45/416	433/18800	4.87496127901047e-18	1.76376099074599e-14	1.51688268850052e-14	MS4A1/CD79A/BLK/FBXO7/CD19/CR2/FCRL3/BATF2/POU2AF1/GPR18/IL27/SOCS1/CD40LG/EOMES/IL15RA/IKZF3/IL23A/KLRC1/MT1G/IL7R/TOX/ITK/GPR68/IFNG/CLEC4D/CCR7/CD8A/LYL1/CD2/SLAMF1/LEF1/SLAMF6/JAK3/TNFSF4/GATA1/SLAMF8/RASGRP1/ITM2A/BCL11B/IRF4/CD3G/CD3D/PBX1/CD27/ZNF683	45
BP	GO:0030098	lymphocyte differentiation	40/416	382/18800	2.97316739543488e-16	5.13615661746362e-13	4.41723515790127e-13	MS4A1/CD79A/FBXO7/CD19/CR2/FCRL3/POU2AF1/GPR18/IL27/SOCS1/CD40LG/EOMES/IL15RA/IKZF3/IL23A/KLRC1/IL7R/TOX/ITK/IFNG/CLEC4D/CCR7/CD8A/LYL1/CD2/SLAMF1/LEF1/SLAMF6/JAK3/TNFSF4/SLAMF8/RASGRP1/ITM2A/BCL11B/IRF4/CD3G/CD3D/PBX1/CD27/ZNF683	40
BP	GO:0002253	activation of immune response	40/416	386/18800	4.25883633288858e-16	5.13615661746362e-13	4.41723515790127e-13	MS4A1/CD79A/BANK1/BLK/GBP1/CD19/CR2/FCRL3/KLRC3/SERPING1/C1QC/CD22/C2/CD160/SH2D1A/C1QB/KLRD1/TXK/PLEKHA1/PLSCR1/KLRC2/KRT1/TRAT1/LAX1/CFB/PYHIN1/ITK/AIM2/C1QA/CCR7/CD8A/BMX/CD8B/CD247/PVRIG/NCR3/IGLL1/YES1/SKAP1/PLCG1	40
BP	GO:0002768	immune response-regulating cell surface receptor signaling pathway	36/416	328/18800	2.25419087617963e-15	2.03891564750448e-12	1.75352321841763e-12	MS4A1/CD79A/BANK1/BLK/GBP1/CD19/CR2/FCRL3/KLRC3/CD22/CD160/SH2D1A/KLRD1/TXK/PLEKHA1/PLSCR1/KLRC2/TRAT1/LAX1/KLRC1/CD200R1/ITK/CLEC4D/CCR7/CD8A/BMX/CD8B/CD247/PVRIG/MS4A2/NCR3/IGLL1/YES1/CD24/SKAP1/PLCG1	36
BP	GO:0002764	immune response-regulating signaling pathway	40/416	482/18800	6.89212510775559e-13	4.98714172797195e-10	4.28907827758432e-10	MS4A1/CD79A/BANK1/BLK/GBP1/CD19/CR2/FCRL3/KLRC3/CD22/CD160/SH2D1A/KLRD1/TXK/PLEKHA1/OAS3/PLSCR1/KLRC2/TRAT1/LAX1/KLRC1/CD200R1/ITK/CLEC4D/CCR7/CD8A/GFI1/BMX/CD8B/CD247/PVRIG/MS4A2/NCR3/IGLL1/YES1/CD24/IRF4/SKAP1/PLCG1/LTF	40
BP	GO:0002429	immune response-activating cell surface receptor signaling pathway	31/416	300/18800	1.07230420391929e-12	5.54228087111428e-10	4.76651312298561e-10	MS4A1/CD79A/BANK1/BLK/GBP1/CD19/CR2/FCRL3/KLRC3/CD22/CD160/SH2D1A/KLRD1/TXK/PLEKHA1/PLSCR1/KLRC2/TRAT1/LAX1/ITK/CCR7/CD8A/BMX/CD8B/CD247/PVRIG/NCR3/IGLL1/YES1/SKAP1/PLCG1	31
BP	GO:0002757	immune response-activating signal transduction	31/416	300/18800	1.07230420391929e-12	5.54228087111428e-10	4.76651312298561e-10	MS4A1/CD79A/BANK1/BLK/GBP1/CD19/CR2/FCRL3/KLRC3/CD22/CD160/SH2D1A/KLRD1/TXK/PLEKHA1/PLSCR1/KLRC2/TRAT1/LAX1/ITK/CCR7/CD8A/BMX/CD8B/CD247/PVRIG/NCR3/IGLL1/YES1/SKAP1/PLCG1	31
BP	GO:0002697	regulation of immune effector process	33/416	353/18800	3.17405935072502e-12	1.43546834136539e-09	1.23454203167673e-09	BLK/CR2/FCRL3/KLRC3/SERPING1/CD22/DNASE1L3/IL27/SH2D1B/CD40LG/CD160/SH2D1A/KLRD1/IL23A/KLRC2/KLRC1/IL7R/IFNG/SLAMF1/SLAMF6/JAK3/CD96/TNFSF4/GATA1/SPON2/SLAMF8/NCR3/RASGRP1/FCER2/CLC/IRF4/TRIM6/ZNF683	33
BP	GO:0002683	negative regulation of immune system process	36/416	425/18800	5.7394293416429e-12	2.30725059534045e-09	1.98429861215163e-09	BANK1/BLK/TNFRSF13B/FBXO7/GBP1/CR2/FCRL3/SERPING1/C1QC/GPR18/CD22/SOCS1/CD160/SH2D1A/KLRD1/CD274/OAS3/ISG15/LAX1/KLRC1/CD200R1/IL7R/PDCD1LG2/GPR68/CNR2/SLAMF1/JAK3/PVRIG/CD96/TNFSF4/SLAMF8/YES1/PDE5A/PLCG1/LTF/THBS1	36
BP	GO:0002443	leukocyte mediated immunity	36/416	457/18800	4.5831909163355e-11	1.65819847353018e-08	1.42609603670397e-08	BLK/CD19/CR2/KLRC3/SERPING1/C1QC/DNASE1L3/SH2D1B/CD40LG/PTGDR/C2/CD160/SH2D1A/C1QB/KLRD1/IL23A/KLRC2/KLRC1/IL7R/C1QA/CD8A/SLAMF1/SLAMF6/JAK3/CD96/TNFSF4/GATA1/SPON2/NCR3/RASGRP1/IGLL1/FCER2/PRF1/CLC/GZMB/CD27	36
BP	GO:0045088	regulation of innate immune response	24/416	231/18800	3.67126402460531e-10	1.20751211282018e-07	1.03849344083572e-07	GBP5/COCH/KLRC3/SERPING1/SH2D1B/SOCS1/CD160/SH2D1A/KLRD1/TXK/OAS3/PLSCR1/KLRC2/ISG15/KLRC1/PYHIN1/AIM2/SLAMF6/CD96/SLAMF8/NCR3/RASGRP1/CCL5/TRIM6	24
BP	GO:0046651	lymphocyte proliferation	27/416	296/18800	5.48133307367836e-10	1.65262192171403e-07	1.42130004963099e-07	MS4A1/CD79A/BLK/TNFRSF13B/CD19/CR2/FCRL3/CD22/IL27/CD40LG/IKZF3/CD274/IL23A/IL7R/PDCD1LG2/SPTA1/SLAMF1/LEF1/JAK3/TNFSF4/RASGRP1/MPL/CLC/CD24/PDE5A/CCL5/CD6	27
BP	GO:0031341	regulation of cell killing	16/416	100/18800	6.11065757781343e-10	1.70064300896377e-07	1.46259949797704e-07	KLRC3/DNASE1L3/CD160/SH2D1A/KLRD1/IL23A/KLRC2/KLRC1/BCL2L1/IL7R/IFNG/SLAMF6/NCR3/RASGRP1/FCER2/PRF1	16
BP	GO:0002449	lymphocyte mediated immunity	30/416	365/18800	7.37865712993598e-10	1.78121991464135e-07	1.5318978405283e-07	CD19/CR2/KLRC3/SERPING1/C1QC/SH2D1B/CD40LG/C2/CD160/SH2D1A/C1QB/KLRD1/IL23A/KLRC2/KLRC1/IL7R/C1QA/CD8A/SLAMF1/SLAMF6/CD96/TNFSF4/NCR3/RASGRP1/IGLL1/FCER2/PRF1/CLC/GZMB/CD27	30
BP	GO:0032943	mononuclear cell proliferation	27/416	300/18800	7.38482551675518e-10	1.78121991464135e-07	1.5318978405283e-07	MS4A1/CD79A/BLK/TNFRSF13B/CD19/CR2/FCRL3/CD22/IL27/CD40LG/IKZF3/CD274/IL23A/IL7R/PDCD1LG2/SPTA1/SLAMF1/LEF1/JAK3/TNFSF4/RASGRP1/MPL/CLC/CD24/PDE5A/CCL5/CD6	27
BP	GO:0030217	T cell differentiation	25/416	263/18800	1.02924756581187e-09	2.32738605819209e-07	2.00161566088151e-07	GPR18/IL27/SOCS1/EOMES/IL23A/KLRC1/IL7R/TOX/ITK/IFNG/CLEC4D/CCR7/CD8A/CD2/LEF1/SLAMF6/JAK3/TNFSF4/RASGRP1/BCL11B/IRF4/CD3G/CD3D/CD27/ZNF683	25
BP	GO:0050851	antigen receptor-mediated signaling pathway	24/416	244/18800	1.12332628974173e-09	2.39070265663858e-07	2.05606966716814e-07	MS4A1/CD79A/BANK1/BLK/GBP1/CD19/FCRL3/CD22/CD160/SH2D1A/TXK/PLEKHA1/TRAT1/LAX1/ITK/CCR7/CD8A/BMX/CD8B/CD247/PVRIG/IGLL1/SKAP1/PLCG1	24
BP	GO:0031349	positive regulation of defense response	26/416	289/18800	1.54825636024394e-09	3.11199528409032e-07	2.67640105314684e-07	GBP5/OSM/COCH/KLRC3/SH2D1B/CD160/SH2D1A/KLRD1/TXK/IL23A/PLSCR1/KLRC2/PYHIN1/ETS1/MMP8/SNCA/IFNG/AIM2/CCR7/SLAMF6/CAMK2N1/TNFSF4/NCR3/RASGRP1/CCL5/TRIM6	26
BP	GO:0050863	regulation of T cell activation	28/416	342/18800	3.01646031222194e-09	5.74397547874682e-07	4.93997600162218e-07	IL27/SOCS1/CD40LG/CD160/CD274/IL23A/LAX1/IL7R/TOX/PDCD1LG2/SPTA1/IFNG/CCR7/CD2/SLAMF1/LEF1/JAK3/TNFSF4/RASGRP1/CLC/YES1/CD24/PDE5A/IRF4/CCL5/CD6/CD27/ZNF683	28
BP	GO:0050867	positive regulation of cell activation	32/416	436/18800	3.29455273522292e-09	5.95984589801827e-07	5.12563046595735e-07	FCRL3/SOCS1/CD40LG/IL15RA/CD160/CD274/IL23A/KLRC2/IL7R/MMP8/TOX/PDCD1LG2/SPTA1/IFNG/CLEC4D/CCR7/CD2/SLAMF1/LEF1/JAK3/TNFSF4/GATA1/GP9/RASGRP1/MPL/IGLL1/YES1/CD24/CCL5/CD6/CD27/THBS1	32
BP	GO:0002831	regulation of response to biotic stimulus	28/416	351/18800	5.35865662326003e-09	8.9067643474677e-07	7.66006092668661e-07	GBP5/COCH/KLRC3/SERPING1/IL27/SH2D1B/SOCS1/CD160/SH2D1A/KLRD1/CD274/TXK/IL23A/OAS3/PLSCR1/KLRC2/ISG15/KLRC1/PYHIN1/AIM2/SLAMF6/CD96/SLAMF8/NCR3/RASGRP1/CCL5/TRIM6/LTF	28
BP	GO:0002696	positive regulation of leukocyte activation	31/416	421/18800	5.41594294207544e-09	8.9067643474677e-07	7.66006092668661e-07	FCRL3/SOCS1/CD40LG/IL15RA/CD160/CD274/IL23A/KLRC2/IL7R/MMP8/TOX/PDCD1LG2/SPTA1/IFNG/CLEC4D/CCR7/CD2/SLAMF1/LEF1/JAK3/TNFSF4/GATA1/RASGRP1/MPL/IGLL1/YES1/CD24/CCL5/CD6/CD27/THBS1	31
BP	GO:0070661	leukocyte proliferation	27/416	330/18800	5.89536693735092e-09	9.27366851275462e-07	7.97560854316216e-07	MS4A1/CD79A/BLK/TNFRSF13B/CD19/CR2/FCRL3/CD22/IL27/CD40LG/IKZF3/CD274/IL23A/IL7R/PDCD1LG2/SPTA1/SLAMF1/LEF1/JAK3/TNFSF4/RASGRP1/MPL/CLC/CD24/PDE5A/CCL5/CD6	27
BP	GO:0002715	regulation of natural killer cell mediated immunity	11/416	50/18800	9.38858154067227e-09	1.41532866725634e-06	1.21722136115032e-06	KLRC3/SH2D1B/CD160/SH2D1A/KLRD1/KLRC2/KLRC1/SLAMF6/CD96/NCR3/RASGRP1	11
BP	GO:0045089	positive regulation of innate immune response	17/416	140/18800	1.36588573261066e-08	1.97670983223414e-06	1.70002451604088e-06	GBP5/COCH/KLRC3/SH2D1B/CD160/SH2D1A/KLRD1/TXK/PLSCR1/KLRC2/PYHIN1/AIM2/SLAMF6/NCR3/RASGRP1/CCL5/TRIM6	17
BP	GO:0002703	regulation of leukocyte mediated immunity	22/416	236/18800	1.50509077568075e-08	2.09439170246653e-06	1.80123414287948e-06	BLK/CR2/KLRC3/DNASE1L3/SH2D1B/CD160/SH2D1A/KLRD1/IL23A/KLRC2/KLRC1/IL7R/SLAMF1/SLAMF6/JAK3/CD96/TNFSF4/GATA1/NCR3/RASGRP1/FCER2/CLC	22
BP	GO:0031343	positive regulation of cell killing	12/416	65/18800	1.64336771359673e-08	2.20211273621962e-06	1.89387717793058e-06	KLRC3/CD160/SH2D1A/KLRD1/IL23A/KLRC2/IFNG/SLAMF6/NCR3/RASGRP1/FCER2/PRF1	12
BP	GO:1903706	regulation of hemopoiesis	28/416	371/18800	1.79152791279959e-08	2.31490999589604e-06	1.99088590610361e-06	FBXO7/FCRL3/TESC/C1QC/IL27/SOCS1/IL15RA/IKZF3/IL23A/ISG15/ETS1/IL7R/TOX/GPR68/IFNG/CD2/LEF1/JAK3/TNFSF4/GATA1/SLAMF8/RASGRP1/MPL/MEIS1/IRF4/CD27/LTF/ZNF683	28
BP	GO:0002717	positive regulation of natural killer cell mediated immunity	9/416	32/18800	2.08463008055181e-08	2.60075573497809e-06	2.2367210592055e-06	KLRC3/SH2D1B/CD160/SH2D1A/KLRD1/KLRC2/SLAMF6/NCR3/RASGRP1	9
BP	GO:0045619	regulation of lymphocyte differentiation	19/416	181/18800	2.16675351014834e-08	2.6131047332389e-06	2.24734153543807e-06	FBXO7/FCRL3/IL27/SOCS1/IL15RA/IKZF3/IL23A/IL7R/TOX/IFNG/CD2/LEF1/JAK3/TNFSF4/SLAMF8/RASGRP1/IRF4/CD27/ZNF683	19
BP	GO:0046632	alpha-beta T cell differentiation	15/416	111/18800	2.2779833717759e-08	2.65862704486619e-06	2.28649196841071e-06	GPR18/IL27/SOCS1/EOMES/IL23A/TOX/ITK/IFNG/LEF1/SLAMF6/JAK3/TNFSF4/BCL11B/IRF4/ZNF683	15
BP	GO:1903039	positive regulation of leukocyte cell-cell adhesion	22/416	245/18800	2.96799683982681e-08	3.35569142702918e-06	2.88598640083159e-06	SOCS1/CD40LG/CD160/CD274/IL23A/ETS1/IL7R/PDCD1LG2/SPTA1/IFNG/CCR7/SLAMF1/LEF1/JAK3/TNFSF4/RASGRP1/YES1/CD24/CCL5/SKAP1/CD6/CD27	22
BP	GO:0001906	cell killing	19/416	185/18800	3.09397890562653e-08	3.39212596380508e-06	2.91732109889378e-06	KLRC3/DNASE1L3/CD160/SH2D1A/KLRD1/IL23A/KLRC2/KLRC1/BCL2L1/IL7R/GNLY/IFNG/SLAMF6/NCR3/RASGRP1/FCER2/PRF1/GZMB/LTF	19
BP	GO:0032103	positive regulation of response to external stimulus	30/416	442/18800	6.00432093178394e-08	6.38930386211597e-06	5.49497606017131e-06	GBP5/OSM/COCH/KLRC3/SH2D1B/SCARF1/CD160/SH2D1A/KLRD1/TXK/IL23A/PLSCR1/KLRC2/PDGFD/PYHIN1/ETS1/MMP8/SNCA/IFNG/AIM2/CCR7/SLAMF1/SLAMF6/CAMK2N1/TNFSF4/NCR3/RASGRP1/CCL5/TRIM6/THBS1	30
BP	GO:0002460	adaptive immune response based on somatic recombination of immune receptors built from immunoglobulin superfamily domains	27/416	370/18800	6.48723063809153e-08	6.70594298531861e-06	5.767294365774e-06	CD19/CR2/BACH2/SERPING1/C1QC/IL27/CD40LG/C2/C1QB/KLRD1/CD274/IL23A/KLRC1/IL7R/C1QA/CD8A/SLAMF1/LEF1/SLAMF6/JAK3/TNFSF4/IGLL1/FCER2/PRF1/CLC/IRF4/CD27	27
BP	GO:0002706	regulation of lymphocyte mediated immunity	18/416	175/18800	6.98814009599462e-08	7.02308079647459e-06	6.040041556655e-06	CR2/KLRC3/SH2D1B/CD160/SH2D1A/KLRD1/IL23A/KLRC2/KLRC1/IL7R/SLAMF1/SLAMF6/CD96/TNFSF4/NCR3/RASGRP1/FCER2/CLC	18
BP	GO:0045954	positive regulation of natural killer cell mediated cytotoxicity	8/416	27/18800	8.2524368618492e-08	7.89681285238222e-06	6.79147502011633e-06	KLRC3/CD160/SH2D1A/KLRD1/KLRC2/SLAMF6/NCR3/RASGRP1	8
BP	GO:0046631	alpha-beta T cell activation	17/416	158/18800	8.36401598073127e-08	7.89681285238222e-06	6.79147502011633e-06	GPR18/IL27/SOCS1/EOMES/CD160/CD274/IL23A/TOX/ITK/IFNG/LEF1/SLAMF6/JAK3/TNFSF4/BCL11B/IRF4/ZNF683	17
BP	GO:0001819	positive regulation of cytokine production	31/416	475/18800	8.70796698032575e-08	7.89681285238222e-06	6.79147502011633e-06	GBP5/OSM/POU2AF1/IL27/CD40LG/CD160/CD274/TXK/IL23A/OAS3/NLRP2/ISG15/TRIM32/PYHIN1/MMP8/ITK/IFNG/AIM2/CCR7/CD2/SLAMF1/MCOLN2/SLAMF6/TNFSF4/SPON2/RASGRP1/IRF4/CD6/TRIM6/THBS1/PANX2	31
BP	GO:0002228	natural killer cell mediated immunity	12/416	75/18800	8.73058358472329e-08	7.89681285238222e-06	6.79147502011633e-06	KLRC3/SH2D1B/CD160/SH2D1A/KLRD1/KLRC2/KLRC1/SLAMF6/CD96/NCR3/RASGRP1/GZMB	12
BP	GO:1902105	regulation of leukocyte differentiation	23/416	283/18800	9.10416977223513e-08	8.03387469169432e-06	6.90935195037922e-06	FBXO7/FCRL3/TESC/C1QC/IL27/SOCS1/IL15RA/IKZF3/IL23A/IL7R/TOX/GPR68/IFNG/CD2/LEF1/JAK3/TNFSF4/SLAMF8/RASGRP1/IRF4/CD27/LTF/ZNF683	23
BP	GO:0002366	leukocyte activation involved in immune response	23/416	285/18800	1.03474986959552e-07	8.91363101951573e-06	7.66596645244203e-06	BLK/CD19/POU2AF1/DNASE1L3/IL27/SH2D1B/CD40LG/EOMES/PTGDR/IL23A/KLRC2/IFNG/CLEC4D/SLAMF1/LEF1/SLAMF6/JAK3/TNFSF4/GATA1/RASGRP1/ITM2A/IRF4/ZNF683	23
BP	GO:0002833	positive regulation of response to biotic stimulus	18/416	180/18800	1.07637211829387e-07	9.05654493950515e-06	7.78887633213384e-06	GBP5/COCH/KLRC3/SH2D1B/CD160/SH2D1A/KLRD1/CD274/TXK/PLSCR1/KLRC2/PYHIN1/AIM2/SLAMF6/NCR3/RASGRP1/CCL5/TRIM6	18
BP	GO:0050870	positive regulation of T cell activation	20/416	223/18800	1.29477684982537e-07	1.0646596915155e-05	9.15636451694688e-06	SOCS1/CD40LG/CD160/CD274/IL23A/IL7R/PDCD1LG2/SPTA1/IFNG/CCR7/SLAMF1/LEF1/JAK3/TNFSF4/RASGRP1/YES1/CD24/CCL5/CD6/CD27	20
BP	GO:0002263	cell activation involved in immune response	23/416	289/18800	1.33178581878755e-07	1.07075579830519e-05	9.20879270254038e-06	BLK/CD19/POU2AF1/DNASE1L3/IL27/SH2D1B/CD40LG/EOMES/PTGDR/IL23A/KLRC2/IFNG/CLEC4D/SLAMF1/LEF1/SLAMF6/JAK3/TNFSF4/GATA1/RASGRP1/ITM2A/IRF4/ZNF683	23
BP	GO:0019221	cytokine-mediated signaling pathway	31/416	486/18800	1.44959915131786e-07	1.14014124553652e-05	9.80552652470387e-06	OSM/SOCS1/PLVAP/IL15RA/TXK/OAS3/TRAF5/ISG15/TRIM32/CCR3/IFITM3/TNFRSF17/IL7R/ADIPOR1/IFNG/AIM2/CCR7/GFI1/CXCR6/CXCR3/JAK3/IL2RB/PPBP/MPL/TNFRSF25/CD24/STAT4/CCL5/PF4V1/TRIM6/CXCL5	31
BP	GO:0042744	hydrogen peroxide catabolic process	8/416	30/18800	2.05259446358665e-07	1.58006101473543e-05	1.35889568518749e-05	HP/SNCA/HBG1/HBM/HBQ1/HBD/HBZ/MPO	8
BP	GO:0050670	regulation of lymphocyte proliferation	20/416	230/18800	2.14298917632665e-07	1.61527809165622e-05	1.38918333447842e-05	BLK/TNFRSF13B/FCRL3/CD22/IL27/CD40LG/IKZF3/CD274/IL23A/PDCD1LG2/SPTA1/SLAMF1/JAK3/TNFSF4/MPL/CLC/CD24/PDE5A/CCL5/CD6	20
BP	GO:0051251	positive regulation of lymphocyte activation	26/416	371/18800	2.51887515000525e-07	1.83421425899833e-05	1.57747442599839e-05	FCRL3/SOCS1/CD40LG/IL15RA/CD160/CD274/IL23A/KLRC2/IL7R/TOX/PDCD1LG2/SPTA1/IFNG/CCR7/SLAMF1/LEF1/JAK3/TNFSF4/RASGRP1/MPL/IGLL1/YES1/CD24/CCL5/CD6/CD27	26
BP	GO:0006968	cellular defense response	10/416	54/18800	2.53484557628294e-07	1.83421425899833e-05	1.57747442599839e-05	LGALS3BP/KLRC3/SH2D1A/KLRC2/TRAT1/CCR3/KLRG1/GNLY/ITK/PRF1	10
BP	GO:0032944	regulation of mononuclear cell proliferation	20/416	233/18800	2.64293205619726e-07	1.87492709398464e-05	1.61248857752716e-05	BLK/TNFRSF13B/FCRL3/CD22/IL27/CD40LG/IKZF3/CD274/IL23A/PDCD1LG2/SPTA1/SLAMF1/JAK3/TNFSF4/MPL/CLC/CD24/PDE5A/CCL5/CD6	20
BP	GO:0042100	B cell proliferation	13/416	100/18800	3.14398253893004e-07	2.10708019607113e-05	1.81214659439244e-05	MS4A1/CD79A/BLK/TNFRSF13B/CD19/CR2/FCRL3/CD22/CD40LG/IKZF3/IL7R/LEF1/RASGRP1	13
BP	GO:0032609	interferon-gamma production	14/416	117/18800	3.14489581503154e-07	2.10708019607113e-05	1.81214659439244e-05	IL27/CD160/CD274/TXK/IL23A/ISG15/PDCD1LG2/CCR7/CD2/SLAMF1/SLAMF6/CD96/TNFSF4/RASGRP1	14
BP	GO:0032649	regulation of interferon-gamma production	14/416	117/18800	3.14489581503154e-07	2.10708019607113e-05	1.81214659439244e-05	IL27/CD160/CD274/TXK/IL23A/ISG15/PDCD1LG2/CCR7/CD2/SLAMF1/SLAMF6/CD96/TNFSF4/RASGRP1	14
BP	GO:0001910	regulation of leukocyte mediated cytotoxicity	12/416	85/18800	3.60225717633345e-07	2.36963026617717e-05	2.03794683507018e-05	KLRC3/DNASE1L3/CD160/SH2D1A/KLRD1/IL23A/KLRC2/KLRC1/IL7R/SLAMF6/NCR3/RASGRP1	12
BP	GO:0022409	positive regulation of cell-cell adhesion	22/416	291/18800	6.02109967556809e-07	3.89006046896524e-05	3.34555839116152e-05	SOCS1/CD40LG/CD160/CD274/IL23A/ETS1/IL7R/PDCD1LG2/SPTA1/IFNG/CCR7/SLAMF1/LEF1/JAK3/TNFSF4/RASGRP1/YES1/CD24/CCL5/SKAP1/CD6/CD27	22
BP	GO:0042269	regulation of natural killer cell mediated cytotoxicity	9/416	46/18800	6.2240084017231e-07	3.95060743814635e-05	3.39763044053435e-05	KLRC3/CD160/SH2D1A/KLRD1/KLRC2/KLRC1/SLAMF6/NCR3/RASGRP1	9
BP	GO:1903037	regulation of leukocyte cell-cell adhesion	24/416	344/18800	7.94655700519172e-07	4.95700745599718e-05	4.26316197955476e-05	SOCS1/CD40LG/CD160/CD274/IL23A/LAX1/ETS1/IL7R/PDCD1LG2/SPTA1/IFNG/CCR7/SLAMF1/LEF1/JAK3/TNFSF4/RASGRP1/YES1/CD24/PDE5A/CCL5/SKAP1/CD6/CD27	24
BP	GO:0070663	regulation of leukocyte proliferation	20/416	254/18800	1.04206147824603e-06	6.39013292931208e-05	5.49568908063382e-05	BLK/TNFRSF13B/FCRL3/CD22/IL27/CD40LG/IKZF3/CD274/IL23A/PDCD1LG2/SPTA1/SLAMF1/JAK3/TNFSF4/MPL/CLC/CD24/PDE5A/CCL5/CD6	20
BP	GO:0002274	myeloid leukocyte activation	19/416	232/18800	1.07636662745863e-06	6.49049076357553e-05	5.58199956275036e-05	BLK/BATF2/DNASE1L3/PTGDR/PLSCR1/MT1G/MMP8/SNCA/IFNG/C1QA/CLEC4D/CNR2/CD2/SLAMF1/GATA1/RASGRP1/IRF4/CCL5/THBS1	19
BP	GO:0032613	interleukin-10 production	10/416	63/18800	1.13369364609703e-06	6.61565098641784e-05	5.68964077735624e-05	CD40LG/CD274/IL23A/ISG15/MMP8/PDCD1LG2/TRIB2/JAK3/TNFSF4/IRF4	10
BP	GO:0032653	regulation of interleukin-10 production	10/416	63/18800	1.13369364609703e-06	6.61565098641784e-05	5.68964077735624e-05	CD40LG/CD274/IL23A/ISG15/MMP8/PDCD1LG2/TRIB2/JAK3/TNFSF4/IRF4	10
BP	GO:0001909	leukocyte mediated cytotoxicity	14/416	131/18800	1.2642866985114e-06	7.26061789716549e-05	6.2443299595651e-05	KLRC3/DNASE1L3/CD160/SH2D1A/KLRD1/IL23A/KLRC2/KLRC1/IL7R/SLAMF6/NCR3/RASGRP1/PRF1/GZMB	14
BP	GO:0050854	regulation of antigen receptor-mediated signaling pathway	10/416	66/18800	1.76411976872334e-06	9.97278956756412e-05	8.57687177030623e-05	BLK/GBP1/CD19/FCRL3/CD22/CD160/SH2D1A/TRAT1/CCR7/PVRIG	10
BP	GO:0042113	B cell activation	23/416	336/18800	1.86793692562424e-06	0.000103972243029362	8.94189725043766e-05	MS4A1/CD79A/BANK1/BLK/TNFRSF13B/CD19/CR2/FCRL3/POU2AF1/CD22/CD40LG/IKZF3/LAX1/IL7R/LYL1/LEF1/JAK3/TNFSF4/SLAMF8/RASGRP1/IGLL1/ITM2A/CD27	23
BP	GO:0002708	positive regulation of lymphocyte mediated immunity	13/416	117/18800	1.9485812952673e-06	0.000106817683731471	9.18661293271157e-05	KLRC3/SH2D1B/CD160/SH2D1A/KLRD1/IL23A/KLRC2/SLAMF1/SLAMF6/TNFSF4/NCR3/RASGRP1/FCER2	13
BP	GO:0030099	myeloid cell differentiation	25/416	391/18800	2.29442833898619e-06	0.000123899130305254	0.00010655664053485	BATF2/TESC/C1QC/IL23A/ISG15/MT1G/TGFBR3/TRIM10/EPB42/ETS1/GPR68/IFNG/CCR7/LEF1/JAK3/GATA1/MPL/SLC4A1/MEIS1/KLF1/IRF4/CLEC1B/ALAS2/TRIM58/LTF	25
BP	GO:0006959	humoral immune response	22/416	317/18800	2.50085111119727e-06	0.000133059990004584	0.000114435230413299	MS4A1/CR2/SERPING1/C1QC/POU2AF1/C2/SH2D1A/C1QB/KRT1/CFB/GNLY/IFNG/C1QA/CCR7/SPON2/PPBP/IGLL1/FCER2/PF4V1/CXCL5/LTF/PI3	22
BP	GO:0035710	CD4-positive, alpha-beta T cell activation	12/416	102/18800	2.63691876248035e-06	0.000138266262067448	0.000118912766771807	IL27/SOCS1/CD160/CD274/IL23A/TOX/IFNG/LEF1/SLAMF6/JAK3/TNFSF4/IRF4	12
BP	GO:0022407	regulation of cell-cell adhesion	27/416	456/18800	3.85020022262035e-06	0.000199000348649149	0.000171145742226553	BLK/SOCS1/CD40LG/EPB41L5/CD160/CD274/IL23A/LAX1/ETS1/IL7R/PDCD1LG2/SPTA1/IFNG/CCR7/SLAMF1/LEF1/JAK3/TNFSF4/RASGRP1/YES1/CD24/PDE5A/ALOX12/CCL5/SKAP1/CD6/CD27	27
BP	GO:0042267	natural killer cell mediated cytotoxicity	10/416	72/18800	3.98415604110515e-06	0.000203023613474908	0.000174605860007514	KLRC3/CD160/SH2D1A/KLRD1/KLRC2/KLRC1/SLAMF6/NCR3/RASGRP1/GZMB	10
BP	GO:0002237	response to molecule of bacterial origin	23/416	354/18800	4.48208888046451e-06	0.000225224966243342	0.000193699630565104	GCH1/FASLG/C2/CD274/SNCA/PDCD1LG2/CCR7/GFI1/CNR2/CD96/TNFSF4/GATA1/SPON2/PPBP/CD24/CCL5/PF4V1/CD6/TRIM6/CXCL5/LTF/MPO/ALPL	23
BP	GO:0007159	leukocyte cell-cell adhesion	24/416	381/18800	4.72378516281882e-06	0.000232638073357082	0.000200075105421295	SOCS1/CD40LG/CD160/CD274/IL23A/LAX1/ETS1/IL7R/PDCD1LG2/SPTA1/IFNG/CCR7/SLAMF1/LEF1/JAK3/TNFSF4/RASGRP1/YES1/CD24/PDE5A/CCL5/SKAP1/CD6/CD27	24
BP	GO:0001912	positive regulation of leukocyte mediated cytotoxicity	9/416	58/18800	4.75821377236707e-06	0.000232638073357082	0.000200075105421295	KLRC3/CD160/SH2D1A/KLRD1/IL23A/KLRC2/SLAMF6/NCR3/RASGRP1	9
BP	GO:0050852	T cell receptor signaling pathway	13/416	127/18800	4.90386112382267e-06	0.000236562260613205	0.000203450013782734	GBP1/CD160/SH2D1A/TXK/TRAT1/ITK/CCR7/CD8A/CD8B/CD247/PVRIG/SKAP1/PLCG1	13
BP	GO:0032496	response to lipopolysaccharide	22/416	333/18800	5.54162869463334e-06	0.000263810692331361	0.000226884410267814	GCH1/FASLG/C2/CD274/SNCA/PDCD1LG2/CCR7/GFI1/CNR2/CD96/TNFSF4/GATA1/SPON2/PPBP/CCL5/PF4V1/CD6/TRIM6/CXCL5/LTF/MPO/ALPL	22
BP	GO:0031295	T cell costimulation	8/416	45/18800	5.65348792982788e-06	0.000265640510780744	0.000228458104177323	CD40LG/CD160/CD274/PDCD1LG2/CCR7/TNFSF4/YES1/CD24	8
BP	GO:0070227	lymphocyte apoptotic process	10/416	75/18800	5.80621675262534e-06	0.000269319130910237	0.000231621818093934	BLK/EFNA1/FASLG/CD274/IL7R/JAK3/CLC/CCL5/CD3G/CD27	10
BP	GO:0030101	natural killer cell activation	11/416	93/18800	6.53165997562906e-06	0.00029648482436057	0.000254985057405907	IL15RA/IL23A/KLRC2/TOX/CD2/SLAMF1/IL2RB/NCR3/RASGRP1/PBX1/ZNF683	11
BP	GO:0002292	T cell differentiation involved in immune response	10/416	76/18800	6.55577278851453e-06	0.00029648482436057	0.000254985057405907	IL27/EOMES/IL23A/IFNG/CLEC4D/LEF1/SLAMF6/JAK3/TNFSF4/IRF4	10
BP	GO:0045580	regulation of T cell differentiation	14/416	151/18800	6.83116516142795e-06	0.000305125377210449	0.000262416169164146	IL27/SOCS1/IL23A/IL7R/TOX/IFNG/CD2/LEF1/JAK3/TNFSF4/RASGRP1/IRF4/CD27/ZNF683	14
BP	GO:0002698	negative regulation of immune effector process	12/416	112/18800	7.0668366757311e-06	0.000311802623082867	0.000268158783227999	CR2/FCRL3/SERPING1/CD22/KLRD1/KLRC1/IL7R/SLAMF1/JAK3/CD96/TNFSF4/SLAMF8	12
BP	GO:0032729	positive regulation of interferon-gamma production	10/416	77/18800	7.38757930339664e-06	0.000322027252044446	0.000276952243764622	IL27/CD160/TXK/IL23A/ISG15/CD2/SLAMF1/SLAMF6/TNFSF4/RASGRP1	10
BP	GO:0045785	positive regulation of cell adhesion	26/416	446/18800	7.68524376718022e-06	0.00033101442797212	0.000284681460849433	EPHA4/SOCS1/CD40LG/EPB41L5/CD160/CD274/IL23A/ETS1/IL7R/PDCD1LG2/SPTA1/IFNG/CCR7/SLAMF1/LEF1/JAK3/TNFSF4/RASGRP1/YES1/CD24/CCL5/SKAP1/SPOCK2/CD6/DAB2/CD27	26
BP	GO:0031294	lymphocyte costimulation	8/416	47/18800	7.9347703038482e-06	0.000337741164227327	0.000290466637995979	CD40LG/CD160/CD274/PDCD1LG2/CCR7/TNFSF4/YES1/CD24	8
BP	GO:0032693	negative regulation of interleukin-10 production	6/416	23/18800	8.3054858803449e-06	0.000349409859477766	0.000300502035034266	CD274/IL23A/MMP8/PDCD1LG2/TRIB2/JAK3	6
BP	GO:0001779	natural killer cell differentiation	6/416	24/18800	1.08681858839022e-05	0.00043917055026149	0.000377698683940812	IL15RA/TOX/SLAMF1/RASGRP1/PBX1/ZNF683	6
BP	GO:2000353	positive regulation of endothelial cell apoptotic process	6/416	24/18800	1.08681858839022e-05	0.00043917055026149	0.000377698683940812	FASLG/CD40LG/CD160/CD248/PLCG1/THBS1	6
BP	GO:0002285	lymphocyte activation involved in immune response	16/416	201/18800	1.08988384264717e-05	0.00043917055026149	0.000377698683940812	CD19/POU2AF1/IL27/CD40LG/EOMES/IL23A/KLRC2/IFNG/CLEC4D/LEF1/SLAMF6/JAK3/TNFSF4/ITM2A/IRF4/ZNF683	16
BP	GO:0045058	T cell selection	8/416	49/18800	1.09482866436808e-05	0.00043917055026149	0.000377698683940812	IL23A/TOX/CCR7/SLAMF6/BCL11B/IRF4/CD3G/CD3D	8
BP	GO:0050777	negative regulation of immune response	15/416	179/18800	1.10916438340618e-05	0.00043917055026149	0.000377698683940812	CR2/SERPING1/CD160/KLRD1/OAS3/ISG15/KLRC1/IL7R/SLAMF1/JAK3/CD96/TNFSF4/SLAMF8/YES1/PLCG1	15
BP	GO:0002699	positive regulation of immune effector process	18/416	248/18800	1.11674103438522e-05	0.00043917055026149	0.000377698683940812	BLK/KLRC3/SH2D1B/CD160/SH2D1A/KLRD1/IL23A/KLRC2/IFNG/SLAMF1/SLAMF6/TNFSF4/GATA1/SPON2/NCR3/RASGRP1/FCER2/TRIM6	18
BP	GO:0043368	positive T cell selection	7/416	36/18800	1.18396206885179e-05	0.000460599437108148	0.000396128112679784	IL23A/TOX/SLAMF6/BCL11B/IRF4/CD3G/CD3D	7
BP	GO:0002705	positive regulation of leukocyte mediated immunity	13/416	138/18800	1.22164102377921e-05	0.000470201832343954	0.000404386435194998	KLRC3/SH2D1B/CD160/SH2D1A/KLRD1/IL23A/KLRC2/SLAMF1/SLAMF6/TNFSF4/NCR3/RASGRP1/FCER2	13
BP	GO:0070231	T cell apoptotic process	8/416	50/18800	1.27843611760555e-05	0.000486882302473358	0.000418732095694407	EFNA1/FASLG/CD274/IL7R/JAK3/CLC/CCL5/CD27	8
BP	GO:0015671	oxygen transport	5/416	15/18800	1.29506896783008e-05	0.000487073793824974	0.000418896783493824	HBG1/HBM/HBQ1/HBD/HBZ	5
BP	GO:0043367	CD4-positive, alpha-beta T cell differentiation	10/416	82/18800	1.3058639580161e-05	0.000487073793824974	0.000418896783493824	IL27/SOCS1/IL23A/TOX/IFNG/LEF1/SLAMF6/JAK3/TNFSF4/IRF4	10
BP	GO:2000514	regulation of CD4-positive, alpha-beta T cell activation	9/416	66/18800	1.41491008543402e-05	0.000521714797002874	0.000448688993611037	IL27/SOCS1/CD160/CD274/IL23A/IFNG/JAK3/TNFSF4/IRF4	9
BP	GO:0034341	response to interferon-gamma	13/416	140/18800	1.42757780274418e-05	0.000521714797002874	0.000448688993611037	GBP4/GBP5/GCH1/GBP1/RAB20/FASLG/SOCS1/GBP6/TXK/IFITM3/SNCA/IFNG/CCL5	13
BP	GO:0050671	positive regulation of lymphocyte proliferation	13/416	141/18800	1.54153719072205e-05	0.000557728155603239	0.00047966146692362	FCRL3/CD40LG/CD274/IL23A/PDCD1LG2/SPTA1/SLAMF1/JAK3/TNFSF4/MPL/CD24/CCL5/CD6	13
BP	GO:0030183	B cell differentiation	13/416	142/18800	1.66340717999767e-05	0.0005958620967556	0.000512457699225962	MS4A1/CD79A/CD19/CR2/FCRL3/POU2AF1/CD40LG/IKZF3/LYL1/JAK3/SLAMF8/ITM2A/CD27	13
BP	GO:0042102	positive regulation of T cell proliferation	11/416	103/18800	1.75375397809358e-05	0.000622066852229665	0.000534994505598001	CD40LG/CD274/IL23A/PDCD1LG2/SPTA1/SLAMF1/JAK3/TNFSF4/CD24/CCL5/CD6	11
BP	GO:0032946	positive regulation of mononuclear cell proliferation	13/416	143/18800	1.7936514162915e-05	0.000624285894540344	0.000536902942672967	FCRL3/CD40LG/CD274/IL23A/PDCD1LG2/SPTA1/SLAMF1/JAK3/TNFSF4/MPL/CD24/CCL5/CD6	13
BP	GO:0002287	alpha-beta T cell activation involved in immune response	9/416	68/18800	1.81177498415523e-05	0.000624285894540344	0.000536902942672967	IL27/EOMES/IL23A/IFNG/LEF1/SLAMF6/JAK3/TNFSF4/IRF4	9
BP	GO:0002293	alpha-beta T cell differentiation involved in immune response	9/416	68/18800	1.81177498415523e-05	0.000624285894540344	0.000536902942672967	IL27/EOMES/IL23A/IFNG/LEF1/SLAMF6/JAK3/TNFSF4/IRF4	9
BP	GO:0051341	regulation of oxidoreductase activity	11/416	106/18800	2.30375490420397e-05	0.000786319362585845	0.000676256156586587	GCH1/HP/SIRT4/SNCA/IFNG/GFI1/CNR2/SLAMF8/FCER2/SLC4A1/GZMA	11
BP	GO:0042743	hydrogen peroxide metabolic process	8/416	55/18800	2.63261033639235e-05	0.000890166747389489	0.000765567747602144	HP/SNCA/HBG1/HBM/HBQ1/HBD/HBZ/MPO	8
BP	GO:0071887	leukocyte apoptotic process	11/416	109/18800	2.99699154527852e-05	0.0010039921676683	0.000863460722012017	BLK/EFNA1/FASLG/CD274/IL7R/CCR7/JAK3/CLC/CCL5/CD3G/CD27	11
BP	GO:0048525	negative regulation of viral process	10/416	91/18800	3.28788770133371e-05	0.00109133740398398	0.000938580014016653	LY6E/OAS3/PLSCR1/ISG15/TRIM32/IFITM3/TRIM10/CCL5/TRIM6/LTF	10
BP	GO:0042129	regulation of T cell proliferation	14/416	174/18800	3.41554651120442e-05	0.00112049113292474	0.000963653018220458	IL27/CD40LG/CD274/IL23A/PDCD1LG2/SPTA1/SLAMF1/JAK3/TNFSF4/CLC/CD24/PDE5A/CCL5/CD6	14
BP	GO:0070228	regulation of lymphocyte apoptotic process	8/416	57/18800	3.43765936303611e-05	0.00112049113292474	0.000963653018220458	BLK/EFNA1/CD274/IL7R/JAK3/CCL5/CD3G/CD27	8
BP	GO:0007596	blood coagulation	16/416	221/18800	3.52142229045292e-05	0.00113754516489809	0.00097831995212207	BLK/SERPING1/CD40LG/TXK/PLSCR1/KRT1/PLAU/GATA1/GP9/MPL/SLC4A1/ALOX12/PF4V1/THBS1/F13A1/PROS1	16
BP	GO:0002820	negative regulation of adaptive immune response	8/416	59/18800	4.43875949911015e-05	0.00142118866086553	0.00122226111591706	CR2/CD160/KLRD1/KLRC1/IL7R/SLAMF1/JAK3/TNFSF4	8
BP	GO:0050817	coagulation	16/416	226/18800	4.61384036960991e-05	0.00146428723309199	0.00125932706671901	BLK/SERPING1/CD40LG/TXK/PLSCR1/KRT1/PLAU/GATA1/GP9/MPL/SLC4A1/ALOX12/PF4V1/THBS1/F13A1/PROS1	16
BP	GO:0007599	hemostasis	16/416	227/18800	4.86508640236832e-05	0.00153059848728422	0.00131635655884675	BLK/SERPING1/CD40LG/TXK/PLSCR1/KRT1/PLAU/GATA1/GP9/MPL/SLC4A1/ALOX12/PF4V1/THBS1/F13A1/PROS1	16
BP	GO:0070665	positive regulation of leukocyte proliferation	13/416	158/18800	5.14091003909149e-05	0.00159327139415359	0.00137025697277298	FCRL3/CD40LG/CD274/IL23A/PDCD1LG2/SPTA1/SLAMF1/JAK3/TNFSF4/MPL/CD24/CCL5/CD6	13
BP	GO:0042098	T cell proliferation	15/416	204/18800	5.15237018009866e-05	0.00159327139415359	0.00137025697277298	IL27/CD40LG/CD274/IL23A/PDCD1LG2/SPTA1/SLAMF1/JAK3/TNFSF4/RASGRP1/CLC/CD24/PDE5A/CCL5/CD6	15
BP	GO:0046006	regulation of activated T cell proliferation	7/416	45/18800	5.42228037792629e-05	0.00166252630570655	0.00142981809073596	CD274/IL23A/PDCD1LG2/SLAMF1/JAK3/CLC/CD24	7
BP	GO:0070233	negative regulation of T cell apoptotic process	5/416	20/18800	6.10219295708412e-05	0.00185527177468322	0.00159558446538175	EFNA1/IL7R/JAK3/CCL5/CD27	5
BP	GO:0098883	synapse pruning	4/416	11/18800	6.89358726219332e-05	0.00207841655955129	0.00178749508307399	C1QC/EPHA4/C1QB/C1QA	4
BP	GO:0032615	interleukin-12 production	8/416	63/18800	7.17764898592478e-05	0.00212858475664556	0.00183064110460687	CD40LG/IL23A/IFNG/CCR7/SLAMF1/JAK3/TNFSF4/THBS1	8
BP	GO:0032655	regulation of interleukin-12 production	8/416	63/18800	7.17764898592478e-05	0.00212858475664556	0.00183064110460687	CD40LG/IL23A/IFNG/CCR7/SLAMF1/JAK3/TNFSF4/THBS1	8
BP	GO:0050858	negative regulation of antigen receptor-mediated signaling pathway	6/416	33/18800	7.55642927113568e-05	0.00222269602463162	0.00191157936888978	GBP1/FCRL3/CD22/CD160/SH2D1A/PVRIG	6
BP	GO:0015669	gas transport	5/416	21/18800	7.86427235341314e-05	0.002294591723762	0.00197341163639128	HBG1/HBM/HBQ1/HBD/HBZ	5
BP	GO:0002819	regulation of adaptive immune response	14/416	188/18800	7.95113222764628e-05	0.00230137571196994	0.00197924605178294	CR2/IL27/CD160/KLRD1/CD274/IL23A/KLRC1/IL7R/SLAMF1/JAK3/TNFSF4/FCER2/CLC/SKAP1	14
BP	GO:0050798	activated T cell proliferation	7/416	48/18800	8.30996667831686e-05	0.00238614757477384	0.00205215217218919	CD274/IL23A/PDCD1LG2/SLAMF1/JAK3/CLC/CD24	7
BP	GO:0070232	regulation of T cell apoptotic process	6/416	34/18800	9.00580510501e-05	0.00256559077715954	0.00220647823376789	EFNA1/CD274/IL7R/JAK3/CCL5/CD27	6
BP	GO:0030218	erythrocyte differentiation	11/416	124/18800	9.82754288588738e-05	0.00277781641883911	0.00238899808969433	ISG15/TGFBR3/TRIM10/EPB42/ETS1/JAK3/GATA1/SLC4A1/KLF1/ALAS2/TRIM58	11
BP	GO:0032823	regulation of natural killer cell differentiation	4/416	12/18800	0.000101599550022827	0.00284951296110533	0.00245065907684599	IL15RA/TOX/RASGRP1/ZNF683	4
BP	GO:0051354	negative regulation of oxidoreductase activity	6/416	35/18800	0.00010667947672868	0.00296897189849511	0.00255339703004031	HP/SNCA/GFI1/CNR2/SLC4A1/GZMA	6
BP	GO:0043370	regulation of CD4-positive, alpha-beta T cell differentiation	7/416	50/18800	0.000108529170048568	0.00298076176268225	0.00256353663567797	IL27/SOCS1/IL23A/IFNG/JAK3/TNFSF4/IRF4	7
BP	GO:2000106	regulation of leukocyte apoptotic process	9/416	85/18800	0.000108750843746284	0.00298076176268225	0.00256353663567797	BLK/EFNA1/CD274/IL7R/CCR7/JAK3/CCL5/CD3G/CD27	9
BP	GO:0002294	CD4-positive, alpha-beta T cell differentiation involved in immune response	8/416	67/18800	0.000111925277027538	0.00300656949995782	0.00258573199554139	IL27/IL23A/IFNG/LEF1/SLAMF6/JAK3/TNFSF4/IRF4	8
BP	GO:0046637	regulation of alpha-beta T cell differentiation	8/416	67/18800	0.000111925277027538	0.00300656949995782	0.00258573199554139	IL27/SOCS1/IL23A/IFNG/JAK3/TNFSF4/IRF4/ZNF683	8
BP	GO:0046634	regulation of alpha-beta T cell activation	10/416	105/18800	0.000112185429102904	0.00300656949995782	0.00258573199554139	IL27/SOCS1/CD160/CD274/IL23A/IFNG/JAK3/TNFSF4/IRF4/ZNF683	10
BP	GO:0018149	peptide cross-linking	6/416	36/18800	0.000125647447936713	0.00334259166643402	0.00287472024845915	KRT1/EPB42/SPOCK2/THBS1/F13A1/PI3	6
BP	GO:0045621	positive regulation of lymphocyte differentiation	10/416	107/18800	0.000131399120823392	0.00347008773094184	0.00298437035077946	SOCS1/IL15RA/IL23A/IL7R/TOX/IFNG/LEF1/TNFSF4/RASGRP1/CD27	10
BP	GO:0070098	chemokine-mediated signaling pathway	9/416	89/18800	0.000155346972255635	0.00404803253372304	0.00348141868717387	CCR3/CCR7/CXCR6/CXCR3/PPBP/MPL/CCL5/PF4V1/CXCL5	9
BP	GO:0042730	fibrinolysis	5/416	24/18800	0.000155521426806938	0.00404803253372304	0.00348141868717387	SERPING1/KRT1/PLAU/THBS1/PROS1	5
BP	GO:0050853	B cell receptor signaling pathway	11/416	131/18800	0.000160641836867829	0.00415144404134147	0.0035703554118895	MS4A1/CD79A/BANK1/BLK/CD19/FCRL3/CD22/PLEKHA1/ITK/BMX/IGLL1	11
BP	GO:0032814	regulation of natural killer cell activation	6/416	38/18800	0.000171561668721529	0.00437119801010205	0.0037593498349951	IL15RA/IL23A/KLRC2/TOX/RASGRP1/ZNF683	6
BP	GO:1904037	positive regulation of epithelial cell apoptotic process	6/416	38/18800	0.000171561668721529	0.00437119801010205	0.0037593498349951	FASLG/CD40LG/CD160/CD248/PLCG1/THBS1	6
BP	GO:0002823	negative regulation of adaptive immune response based on somatic recombination of immune receptors built from immunoglobulin superfamily domains	7/416	54/18800	0.000178360212567122	0.00451263810536957	0.00388099218511898	CR2/KLRD1/KLRC1/IL7R/SLAMF1/JAK3/TNFSF4	7
BP	GO:0034101	erythrocyte homeostasis	11/416	133/18800	0.000183677976905886	0.00458830313401425	0.00394606617908881	ISG15/TGFBR3/TRIM10/EPB42/ETS1/JAK3/GATA1/SLC4A1/KLF1/ALAS2/TRIM58	11
BP	GO:0001818	negative regulation of cytokine production	20/416	363/18800	0.000183887217919311	0.00458830313401425	0.00394606617908881	BANK1/GBP1/GPR18/CD274/IL23A/OAS3/CD200R1/MMP8/PDCD1LG2/IFNG/CCR7/SLAMF1/TRIB2/LEF1/JAK3/CD96/TNFSF4/CD24/LTF/THBS1	20
BP	GO:0032816	positive regulation of natural killer cell activation	5/416	25/18800	0.000190893134965646	0.00469830858711366	0.0040406738772535	IL15RA/IL23A/KLRC2/TOX/RASGRP1	5
BP	GO:0035821	modulation of process of another organism	5/416	25/18800	0.000190893134965646	0.00469830858711366	0.0040406738772535	BCL2L1/IFNG/FCER2/PRF1/LTF	5
BP	GO:0048872	homeostasis of number of cells	17/416	282/18800	0.000194439597307356	0.00475325988552712	0.00408793349673218	TNFRSF13B/ISG15/TNFRSF17/TGFBR3/TRIM10/EPB42/ETS1/IL7R/SPTA1/CCR7/JAK3/GATA1/MPL/SLC4A1/KLF1/ALAS2/TRIM58	17
BP	GO:0043374	CD8-positive, alpha-beta T cell differentiation	4/416	14/18800	0.000198357186444522	0.0047818144450335	0.00411249119883594	GPR18/SOCS1/EOMES/TOX	4
BP	GO:1902107	positive regulation of leukocyte differentiation	12/416	157/18800	0.000199572686898855	0.0047818144450335	0.00411249119883594	TESC/SOCS1/IL15RA/IL23A/IL7R/TOX/GPR68/IFNG/LEF1/TNFSF4/RASGRP1/CD27	12
BP	GO:1903708	positive regulation of hemopoiesis	12/416	157/18800	0.000199572686898855	0.0047818144450335	0.00411249119883594	TESC/SOCS1/IL15RA/IL23A/IL7R/TOX/GPR68/IFNG/LEF1/TNFSF4/RASGRP1/CD27	12
BP	GO:0061515	myeloid cell development	8/416	74/18800	0.000226084881165713	0.00538141513195756	0.00462816418785212	EPB42/GPR68/GATA1/SLC4A1/MEIS1/ALAS2/TRIM58/LTF	8
BP	GO:0002262	myeloid cell homeostasis	12/416	160/18800	0.000238014986143425	0.00562835437821511	0.00484053869308541	ISG15/TGFBR3/TRIM10/EPB42/ETS1/JAK3/GATA1/MPL/SLC4A1/KLF1/ALAS2/TRIM58	12
BP	GO:0032102	negative regulation of response to external stimulus	22/416	429/18800	0.000245572576729184	0.00576936092601422	0.00496180818052952	SOCS3/SERPING1/GPR18/EPHA4/KLRD1/OAS3/KRT1/ISG15/KLRC1/CD200R1/PHLDB2/GRIN3A/CNR2/PLAU/CD96/SLAMF8/YES1/ALOX12/PLCG1/LTF/THBS1/PROS1	22
BP	GO:0045071	negative regulation of viral genome replication	7/416	57/18800	0.000251545217074227	0.00587155222822292	0.00504969549522183	OAS3/PLSCR1/ISG15/IFITM3/CCL5/TRIM6/LTF	7
BP	GO:0002286	T cell activation involved in immune response	10/416	116/18800	0.000255849921715166	0.00593375010747096	0.00510318737240236	IL27/EOMES/IL23A/IFNG/CLEC4D/LEF1/SLAMF6/JAK3/TNFSF4/IRF4	10
BP	GO:0018108	peptidyl-tyrosine phosphorylation	20/416	373/18800	0.000262624176592599	0.0060505313576734	0.00520362244138447	OSM/SOCS3/BANK1/BLK/EPHA4/EFNA1/SOCS1/DYRK2/TXK/IL23A/PDGFD/ITK/IFNG/BMX/JAK3/GATA1/MATK/YES1/CD24/CCL5	20
BP	GO:0032733	positive regulation of interleukin-10 production	6/416	41/18800	0.000264229948732006	0.0060505313576734	0.00520362244138447	CD40LG/CD274/IL23A/ISG15/TNFSF4/IRF4	6
BP	GO:0046330	positive regulation of JNK cascade	9/416	96/18800	0.000276663228886976	0.00629539347240931	0.00541421055670243	GADD45B/TRAF5/TNIK/MMP8/CCR7/SLAMF1/RASGRP1/EDAR/CD27	9
BP	GO:0036037	CD8-positive, alpha-beta T cell activation	5/416	27/18800	0.000279690879106938	0.00632451000380563	0.00543925157000071	GPR18/SOCS1/EOMES/CD274/TOX	5
BP	GO:0018212	peptidyl-tyrosine modification	20/416	376/18800	0.000291392275972652	0.00654818170477675	0.00563161534995201	OSM/SOCS3/BANK1/BLK/EPHA4/EFNA1/SOCS1/DYRK2/TXK/IL23A/PDGFD/ITK/IFNG/BMX/JAK3/GATA1/MATK/YES1/CD24/CCL5	20
BP	GO:0071346	cellular response to interferon-gamma	10/416	118/18800	0.000293960630882803	0.00656512075638259	0.00564618339759301	GBP4/GBP5/GBP1/RAB20/FASLG/SOCS1/GBP6/TXK/IFNG/CCL5	10
BP	GO:1990868	response to chemokine	9/416	97/18800	0.00029910834028414	0.00659862179968304	0.00567499521103927	CCR3/CCR7/CXCR6/CXCR3/PPBP/MPL/CCL5/PF4V1/CXCL5	9
BP	GO:1990869	cellular response to chemokine	9/416	97/18800	0.00029910834028414	0.00659862179968304	0.00567499521103927	CCR3/CCR7/CXCR6/CXCR3/PPBP/MPL/CCL5/PF4V1/CXCL5	9
BP	GO:0045639	positive regulation of myeloid cell differentiation	9/416	99/18800	0.000348529032119827	0.00764229114066384	0.00657257938721664	TESC/IL23A/ISG15/ETS1/GPR68/IFNG/LEF1/GATA1/MPL	9
BP	GO:0007204	positive regulation of cytosolic calcium ion concentration	18/416	325/18800	0.00035870302544113	0.00781799726533739	0.0067236914597589	MS4A1/CD19/GPR18/FASLG/PTGDR/P2RY10/CCR3/SNCA/CCR7/CXCR6/CXCR3/ITPR3/MCOLN2/JAK3/GATA1/GP9/CD24/PLCG1	18
BP	GO:0050856	regulation of T cell receptor signaling pathway	6/416	44/18800	0.00039229156692377	0.00849350717805181	0.00730464845896865	GBP1/CD160/SH2D1A/TRAT1/CCR7/PVRIG	6
BP	GO:0001773	myeloid dendritic cell activation	5/416	29/18800	0.000396739279461237	0.00849350717805181	0.00730464845896865	BATF2/CLEC4D/CD2/SLAMF1/IRF4	5
BP	GO:0002825	regulation of T-helper 1 type immune response	5/416	29/18800	0.000396739279461237	0.00849350717805181	0.00730464845896865	IL27/IL23A/SLAMF1/JAK3/TNFSF4	5
BP	GO:0042088	T-helper 1 type immune response	6/416	45/18800	0.000444302145869079	0.00945579508090781	0.00813224237268729	IL27/IL23A/SLAMF1/LEF1/JAK3/TNFSF4	6
BP	GO:0019932	second-messenger-mediated signaling	17/416	303/18800	0.000447978715982497	0.00947828651710335	0.00815158562292558	GBP1/RUNDC3A/CD22/DYRK2/PDE7B/TRAT1/CCR3/CCR7/NCALD/NMUR1/CXCR6/CXCR3/ITPR3/CAMTA1/PDE5A/PLCG1/THBS1	17
BP	GO:0002822	regulation of adaptive immune response based on somatic recombination of immune receptors built from immunoglobulin superfamily domains	12/416	173/18800	0.000485759932200888	0.0102179036901326	0.00878767661925229	CR2/IL27/KLRD1/CD274/IL23A/KLRC1/IL7R/SLAMF1/JAK3/TNFSF4/FCER2/CLC	12
BP	GO:0009615	response to virus	20/416	392/18800	0.000496246279783165	0.0103781447413612	0.00892548830568321	GBP1/POU2AF1/IL27/ZNF175/IL23A/OAS3/PLSCR1/ISG15/TRIM32/BCL2L1/IFITM3/IFNG/AIM2/IFI44L/TNFSF4/SPON2/PRF1/VWCE/CCL5/TRIM6	20
BP	GO:0031640	killing of cells of another organism	6/416	46/18800	0.000501534928038934	0.0104284676416372	0.00896876737618324	BCL2L1/GNLY/IFNG/FCER2/PRF1/LTF	6
BP	GO:0042093	T-helper cell differentiation	7/416	65/18800	0.000569322387527292	0.0117034568072372	0.010065292927815	IL27/IL23A/LEF1/SLAMF6/JAK3/TNFSF4/IRF4	7
BP	GO:0072577	endothelial cell apoptotic process	7/416	65/18800	0.000569322387527292	0.0117034568072372	0.010065292927815	COL4A3/FASLG/CD40LG/CD160/CD248/PLCG1/THBS1	7
BP	GO:0030195	negative regulation of blood coagulation	6/416	48/18800	0.000633092626285476	0.0128681411342745	0.0110669533015959	SERPING1/KRT1/PLAU/ALOX12/THBS1/PROS1	6
BP	GO:0033628	regulation of cell adhesion mediated by integrin	6/416	48/18800	0.000633092626285476	0.0128681411342745	0.0110669533015959	MUC1/TESC/EFNA1/PLAU/CCL5/SKAP1	6
BP	GO:0035456	response to interferon-beta	5/416	32/18800	0.000637100984948273	0.0128772701873902	0.0110748045369426	PLSCR1/IFITM3/PYHIN1/AIM2/TRIM6	5
BP	GO:0002704	negative regulation of leukocyte mediated immunity	7/416	67/18800	0.00068480104125739	0.0137645009292735	0.0118378472395137	CR2/KLRD1/KLRC1/IL7R/SLAMF1/JAK3/CD96	7
BP	GO:0032695	negative regulation of interleukin-12 production	4/416	19/18800	0.00070358214438753	0.0139865944966708	0.0120288537814317	CCR7/SLAMF1/JAK3/THBS1	4
BP	GO:0060216	definitive hemopoiesis	4/416	19/18800	0.00070358214438753	0.0139865944966708	0.0120288537814317	TGFBR3/LYL1/GATA1/MEIS1	4
BP	GO:1900047	negative regulation of hemostasis	6/416	49/18800	0.000708157890863951	0.0140006297767529	0.012040924506148	SERPING1/KRT1/PLAU/ALOX12/THBS1/PROS1	6
BP	GO:0070229	negative regulation of lymphocyte apoptotic process	5/416	33/18800	0.000737375394276293	0.0144990444374545	0.0124695747453131	EFNA1/IL7R/JAK3/CCL5/CD27	5
BP	GO:0071902	positive regulation of protein serine/threonine kinase activity	13/416	208/18800	0.000770259704821907	0.0150637816867333	0.0129552642244868	EPHA4/FAM20A/CD40LG/PDGFD/SNCA/IFNG/RASGRP1/TCL1A/CD24/PDE5A/TCL1B/LTF/THBS1	13
BP	GO:0051607	defense response to virus	16/416	290/18800	0.000782140353901464	0.0152138914000833	0.0130843626832639	GBP1/IL27/ZNF175/IL23A/OAS3/PLSCR1/ISG15/TRIM32/BCL2L1/IFITM3/IFNG/AIM2/IFI44L/SPON2/PRF1/TRIM6	16
BP	GO:2000107	negative regulation of leukocyte apoptotic process	6/416	50/18800	0.000789925443702411	0.015272803185417	0.0131350284298079	EFNA1/IL7R/CCR7/JAK3/CCL5/CD27	6
BP	GO:0055074	calcium ion homeostasis	22/416	468/18800	0.000793611663587173	0.015272803185417	0.0131350284298079	MS4A1/CD19/GPR18/FASLG/FAM20A/PTGDR/P2RY10/CCR3/SNCA/CCR7/CXCR6/CXCR3/ITPR3/MCOLN2/JAK3/GATA1/GP9/CD24/CCL5/PLCG1/KEL/XK	22
BP	GO:0140546	defense response to symbiont	16/416	291/18800	0.000811284760186387	0.0155303082664251	0.0133564898418878	GBP1/IL27/ZNF175/IL23A/OAS3/PLSCR1/ISG15/TRIM32/BCL2L1/IFITM3/IFNG/AIM2/IFI44L/SPON2/PRF1/TRIM6	16
BP	GO:0050792	regulation of viral process	11/416	159/18800	0.000844037129762844	0.0160722438709577	0.013822569282986	LY6E/OAS3/PLSCR1/ISG15/TRIM32/IFITM3/TRIM10/CCL5/LAMP3/TRIM6/LTF	11
BP	GO:0002456	T cell mediated immunity	9/416	112/18800	0.000860469781461466	0.016200807837802	0.0139331378105212	KLRD1/IL23A/KLRC1/IL7R/CD8A/SLAMF1/TNFSF4/PRF1/CLC	9
BP	GO:0043373	CD4-positive, alpha-beta T cell lineage commitment	4/416	20/18800	0.000864222198091702	0.016200807837802	0.0139331378105212	IL23A/TOX/SLAMF6/IRF4	4
BP	GO:0046629	gamma-delta T cell activation	4/416	20/18800	0.000864222198091702	0.016200807837802	0.0139331378105212	GPR18/KLRC1/ITK/LEF1	4
BP	GO:0051250	negative regulation of lymphocyte activation	11/416	161/18800	0.00093546267852767	0.0174458967572841	0.0150039483327607	BANK1/BLK/TNFRSF13B/FBXO7/SOCS1/CD274/LAX1/PDCD1LG2/JAK3/TNFSF4/PDE5A	11
BP	GO:0071706	tumor necrosis factor superfamily cytokine production	12/416	187/18800	0.000966446591496969	0.017839815143041	0.0153427289176425	GPR18/CD274/IL23A/OAS3/MMP8/IFNG/CD2/SLAMF1/SPON2/RASGRP1/LTF/THBS1	12
BP	GO:1903555	regulation of tumor necrosis factor superfamily cytokine production	12/416	187/18800	0.000966446591496969	0.017839815143041	0.0153427289176425	GPR18/CD274/IL23A/OAS3/MMP8/IFNG/CD2/SLAMF1/SPON2/RASGRP1/LTF/THBS1	12
BP	GO:0050819	negative regulation of coagulation	6/416	52/18800	0.00097516264713231	0.0179093322706837	0.015402515548614	SERPING1/KRT1/PLAU/ALOX12/THBS1/PROS1	6
BP	GO:1903035	negative regulation of response to wounding	8/416	92/18800	0.000989214549728898	0.0180756476814099	0.0155455513503382	SERPING1/EPHA4/KRT1/PHLDB2/PLAU/ALOX12/THBS1/PROS1	8
BP	GO:0051480	regulation of cytosolic calcium ion concentration	18/416	356/18800	0.00103564610594522	0.0188289829714061	0.0161934403024283	MS4A1/CD19/GPR18/FASLG/PTGDR/P2RY10/CCR3/SNCA/CCR7/CXCR6/CXCR3/ITPR3/MCOLN2/JAK3/GATA1/GP9/CD24/PLCG1	18
BP	GO:0045063	T-helper 1 cell differentiation	4/416	21/18800	0.00104906442739936	0.0188831596931886	0.0162400337648207	IL27/LEF1/JAK3/TNFSF4	4
BP	GO:0150146	cell junction disassembly	4/416	21/18800	0.00104906442739936	0.0188831596931886	0.0162400337648207	C1QC/EPHA4/C1QB/C1QA	4
BP	GO:1903900	regulation of viral life cycle	10/416	139/18800	0.0010673494576233	0.0191171798895103	0.0164412975337909	LY6E/OAS3/PLSCR1/ISG15/IFITM3/TRIM10/CCL5/LAMP3/TRIM6/LTF	10
BP	GO:0050866	negative regulation of cell activation	13/416	216/18800	0.00108973086606709	0.019421902824782	0.0167033675918814	BANK1/BLK/TNFRSF13B/FBXO7/SOCS1/CD274/LAX1/PDCD1LG2/CNR2/JAK3/TNFSF4/PDE5A/ALOX12	13
BP	GO:0045582	positive regulation of T cell differentiation	8/416	94/18800	0.00113867215956205	0.0199975009934333	0.0171983977587468	SOCS1/IL23A/IL7R/IFNG/LEF1/TNFSF4/RASGRP1/CD27	8
BP	GO:0045824	negative regulation of innate immune response	7/416	73/18800	0.00114570960537791	0.0199975009934333	0.0171983977587468	SERPING1/KLRD1/OAS3/ISG15/KLRC1/CD96/SLAMF8	7
BP	GO:0001865	NK T cell differentiation	3/416	10/18800	0.00114966285423829	0.0199975009934333	0.0171983977587468	TOX/ITK/ZNF683	3
BP	GO:0001915	negative regulation of T cell mediated cytotoxicity	3/416	10/18800	0.00114966285423829	0.0199975009934333	0.0171983977587468	KLRD1/KLRC1/IL7R	3
BP	GO:0045625	regulation of T-helper 1 cell differentiation	3/416	10/18800	0.00114966285423829	0.0199975009934333	0.0171983977587468	IL27/JAK3/TNFSF4	3
BP	GO:1904019	epithelial cell apoptotic process	9/416	118/18800	0.0012471659050084	0.0213045741659976	0.0183225164338218	COL4A3/FASLG/CD40LG/E2F2/CD160/BCL2L1/CD248/PLCG1/THBS1	9
BP	GO:0048821	erythrocyte development	5/416	37/18800	0.00125965237842396	0.0213045741659976	0.0183225164338218	EPB42/GATA1/SLC4A1/ALAS2/TRIM58	5
BP	GO:0002363	alpha-beta T cell lineage commitment	4/416	22/18800	0.00125998247930004	0.0213045741659976	0.0183225164338218	IL23A/TOX/SLAMF6/IRF4	4
BP	GO:0043369	CD4-positive or CD8-positive, alpha-beta T cell lineage commitment	4/416	22/18800	0.00125998247930004	0.0213045741659976	0.0183225164338218	IL23A/TOX/SLAMF6/IRF4	4
BP	GO:0045061	thymic T cell selection	4/416	22/18800	0.00125998247930004	0.0213045741659976	0.0183225164338218	TOX/CCR7/CD3G/CD3D	4
BP	GO:0002700	regulation of production of molecular mediator of immune response	11/416	167/18800	0.00126013788599323	0.0213045741659976	0.0183225164338218	FCRL3/CD22/CD40LG/CD160/SLAMF1/JAK3/CD96/TNFSF4/SPON2/CLC/TRIM6	11
BP	GO:0002695	negative regulation of leukocyte activation	12/416	193/18800	0.00126907953132258	0.0213559522991865	0.0183667030334861	BANK1/BLK/TNFRSF13B/FBXO7/SOCS1/CD274/LAX1/PDCD1LG2/CNR2/JAK3/TNFSF4/PDE5A	12
BP	GO:0002707	negative regulation of lymphocyte mediated immunity	6/416	55/18800	0.00131350629055155	0.0218998422083664	0.0188344632300285	CR2/KLRD1/KLRC1/IL7R/SLAMF1/CD96	6
BP	GO:1905517	macrophage migration	6/416	55/18800	0.00131350629055155	0.0218998422083664	0.0188344632300285	CD200R1/SLAMF1/MCOLN2/SLAMF8/CCL5/THBS1	6
BP	GO:0042742	defense response to bacterium	18/416	364/18800	0.0013290883253126	0.0220579888118393	0.0189704736341093	GBP4/COCH/HP/GBP6/CD160/IL23A/OAS3/ISG15/IL7R/GNLY/CLEC4D/SPON2/SLAMF8/PPBP/IGLL1/LTF/MPO/PI3	18
BP	GO:0006874	cellular calcium ion homeostasis	21/416	456/18800	0.00133721113753255	0.0220914607104692	0.0189992603823418	MS4A1/CD19/GPR18/FASLG/PTGDR/P2RY10/CCR3/SNCA/CCR7/CXCR6/CXCR3/ITPR3/MCOLN2/JAK3/GATA1/GP9/CD24/CCL5/PLCG1/KEL/XK	21
BP	GO:0045860	positive regulation of protein kinase activity	19/416	396/18800	0.00140155139736999	0.0230491497985666	0.0198228991895967	EPHA4/EFNA1/FAM20A/SOCS1/CD40LG/IL23A/PDGFD/SNCA/IFNG/CCR7/AXIN2/RASGRP1/TCL1A/CD24/PDE5A/TCL1B/CCL5/LTF/THBS1	19
BP	GO:0051098	regulation of binding	18/416	366/18800	0.0014126025217528	0.0231116316086516	0.0198766352550622	SMARCD3/BLK/EPHA4/GAS8/EPB41L5/TGFBR3/PYHIN1/HOPX/MMP8/SPTA1/IFNG/CLDN5/LEF1/GATA1/IRF4/GZMA/TRIM6/DAB2	18
BP	GO:0002701	negative regulation of production of molecular mediator of immune response	5/416	38/18800	0.00142451460716675	0.0231116316086516	0.0198766352550622	FCRL3/CD22/SLAMF1/JAK3/CD96	5
BP	GO:0045622	regulation of T-helper cell differentiation	5/416	38/18800	0.00142451460716675	0.0231116316086516	0.0198766352550622	IL27/IL23A/JAK3/TNFSF4/IRF4	5
BP	GO:0061045	negative regulation of wound healing	7/416	76/18800	0.0014528033958383	0.0234653691345668	0.0201808592015884	SERPING1/KRT1/PHLDB2/PLAU/ALOX12/THBS1/PROS1	7
BP	GO:0002718	regulation of cytokine production involved in immune response	8/416	98/18800	0.00149147265714408	0.0239828803268768	0.0206259329802007	CD160/SLAMF1/JAK3/CD96/TNFSF4/SPON2/CLC/TRIM6	8
BP	GO:2000508	regulation of dendritic cell chemotaxis	3/416	11/18800	0.00155493547234442	0.0248927280484165	0.0214084269038198	CCR7/SLAMF1/SLAMF8	3
BP	GO:0032768	regulation of monooxygenase activity	6/416	57/18800	0.00158444750284844	0.0251560758244082	0.0216349131933755	GCH1/SNCA/IFNG/GFI1/CNR2/FCER2	6
BP	GO:0072503	cellular divalent inorganic cation homeostasis	22/416	494/18800	0.00158529167716006	0.0251560758244082	0.0216349131933755	MS4A1/CD19/GPR18/FASLG/PTGDR/P2RY10/CCR3/MT1G/SNCA/CCR7/CXCR6/CXCR3/ITPR3/MCOLN2/JAK3/GATA1/GP9/CD24/CCL5/PLCG1/KEL/XK	22
BP	GO:2000516	positive regulation of CD4-positive, alpha-beta T cell activation	5/416	39/18800	0.00160473604484591	0.025353427992369	0.0218046414551345	SOCS1/CD160/IL23A/IFNG/TNFSF4	5
BP	GO:0033077	T cell differentiation in thymus	7/416	78/18800	0.00169078867605158	0.0264755875334043	0.0227697293499587	IL7R/TOX/CCR7/RASGRP1/BCL11B/CD3G/CD3D	7
BP	GO:0002367	cytokine production involved in immune response	8/416	100/18800	0.0016977159501796	0.0264755875334043	0.0227697293499587	CD160/SLAMF1/JAK3/CD96/TNFSF4/SPON2/CLC/TRIM6	8
BP	GO:0098869	cellular oxidant detoxification	8/416	100/18800	0.0016977159501796	0.0264755875334043	0.0227697293499587	GCH1/HP/HBG1/HBM/HBQ1/HBD/HBZ/MPO	8
BP	GO:0019835	cytolysis	4/416	24/18800	0.0017675097578455	0.0273284201020728	0.0235031886828219	PRF1/GZMA/GZMH/GZMB	4
BP	GO:0050855	regulation of B cell receptor signaling pathway	4/416	24/18800	0.0017675097578455	0.0273284201020728	0.0235031886828219	BLK/CD19/FCRL3/CD22	4
BP	GO:0060326	cell chemotaxis	16/416	315/18800	0.00184546459925155	0.0284123017876259	0.0244353565750843	GPR18/IL23A/CCR3/PDGFD/CCR7/CNR2/CXCR6/CXCR3/SLAMF1/LEF1/SLAMF8/PPBP/CCL5/PF4V1/CXCL5/THBS1	16
BP	GO:0019722	calcium-mediated signaling	12/416	202/18800	0.00186692725825621	0.0286209441541142	0.0246147947163486	GBP1/CD22/DYRK2/TRAT1/CCR3/CCR7/NCALD/NMUR1/CXCR6/CXCR3/CAMTA1/PLCG1	12
BP	GO:0098754	detoxification	10/416	150/18800	0.00189280413860874	0.0288208997753072	0.0247867620190882	GCH1/HP/ABCB1/MT1G/HBG1/HBM/HBQ1/HBD/HBZ/MPO	10
BP	GO:2000351	regulation of endothelial cell apoptotic process	6/416	59/18800	0.00189590219638561	0.0288208997753072	0.0247867620190882	FASLG/CD40LG/CD160/CD248/PLCG1/THBS1	6
BP	GO:1905521	regulation of macrophage migration	5/416	41/18800	0.00201461665875825	0.0304974187087337	0.0262286141523426	CD200R1/SLAMF1/SLAMF8/CCL5/THBS1	5
BP	GO:0033690	positive regulation of osteoblast proliferation	3/416	12/18800	0.00203938077978495	0.0307436652552582	0.0264403929168611	TMEM119/GATA1/LTF	3
BP	GO:0032760	positive regulation of tumor necrosis factor production	8/416	103/18800	0.00204867681584555	0.0307556544387103	0.0264507039425178	IL23A/OAS3/MMP8/IFNG/CD2/SPON2/RASGRP1/THBS1	8
BP	GO:0050860	negative regulation of T cell receptor signaling pathway	4/416	25/18800	0.0020678176860131	0.030914728876014	0.0265875123090679	GBP1/CD160/SH2D1A/PVRIG	4
BP	GO:0032689	negative regulation of interferon-gamma production	5/416	42/18800	0.00224597296164682	0.0331788697232738	0.0285347353588773	CD274/PDCD1LG2/SLAMF1/CD96/TNFSF4	5
BP	GO:0032735	positive regulation of interleukin-12 production	5/416	42/18800	0.00224597296164682	0.0331788697232738	0.0285347353588773	CD40LG/IL23A/IFNG/CCR7/TNFSF4	5
BP	GO:0033674	positive regulation of kinase activity	21/416	476/18800	0.00224677254897791	0.0331788697232738	0.0285347353588773	CD19/EPHA4/LMTK2/EFNA1/FAM20A/SOCS1/CD40LG/IL23A/PDGFD/SNCA/IFNG/CCR7/AXIN2/RASGRP1/TCL1A/CD24/PDE5A/TCL1B/CCL5/LTF/THBS1	21
BP	GO:0097530	granulocyte migration	10/416	154/18800	0.00229751360786395	0.0337902611107796	0.0290605486728534	IL23A/CCR7/SLAMF1/MCOLN2/SLAMF8/PPBP/CCL5/PF4V1/CXCL5/THBS1	10
BP	GO:0046425	regulation of receptor signaling pathway via JAK-STAT	8/416	105/18800	0.0023127120382011	0.0338760815959983	0.0291343566372148	SOCS3/SOCS1/IL23A/IL7R/ADIPOR1/IFNG/JAK3/CCL5	8
BP	GO:0045637	regulation of myeloid cell differentiation	12/416	208/18800	0.00238123314788176	0.0347391190686945	0.029876592466632	TESC/C1QC/IL23A/ISG15/ETS1/GPR68/IFNG/LEF1/GATA1/MPL/MEIS1/LTF	12
BP	GO:0002407	dendritic cell chemotaxis	4/416	26/18800	0.00240158808214804	0.0347557827248465	0.029890923666651	CCR7/SLAMF1/SLAMF8/CCL5	4
BP	GO:0042832	defense response to protozoan	4/416	26/18800	0.00240158808214804	0.0347557827248465	0.029890923666651	GBP4/BATF2/GBP6/IRF4	4
BP	GO:0030168	platelet activation	9/416	130/18800	0.00243785595531449	0.0351400910212264	0.0302214393118458	BLK/CD40LG/TXK/PLSCR1/GATA1/GP9/MPL/ALOX12/PF4V1	9
BP	GO:0032640	tumor necrosis factor production	11/416	182/18800	0.00249122673491394	0.0356255269838681	0.0306389275157296	GPR18/IL23A/OAS3/MMP8/IFNG/CD2/SLAMF1/SPON2/RASGRP1/LTF/THBS1	11
BP	GO:0032680	regulation of tumor necrosis factor production	11/416	182/18800	0.00249122673491394	0.0356255269838681	0.0306389275157296	GPR18/IL23A/OAS3/MMP8/IFNG/CD2/SLAMF1/SPON2/RASGRP1/LTF/THBS1	11
BP	GO:0006956	complement activation	9/416	131/18800	0.00256788614791287	0.0364305526329839	0.0313312715903234	CR2/SERPING1/C1QC/C2/C1QB/KRT1/CFB/C1QA/IGLL1	9
BP	GO:0002573	myeloid leukocyte differentiation	12/416	210/18800	0.00257636036965258	0.0364305526329839	0.0313312715903234	BATF2/TESC/C1QC/IL23A/MT1G/GPR68/IFNG/CCR7/LEF1/GATA1/IRF4/LTF	12
BP	GO:1903557	positive regulation of tumor necrosis factor superfamily cytokine production	8/416	107/18800	0.00260272557728362	0.0364305526329839	0.0313312715903234	IL23A/OAS3/MMP8/IFNG/CD2/SPON2/RASGRP1/THBS1	8
BP	GO:0042492	gamma-delta T cell differentiation	3/416	13/18800	0.00260793618903893	0.0364305526329839	0.0313312715903234	GPR18/KLRC1/LEF1	3
BP	GO:0061000	negative regulation of dendritic spine development	3/416	13/18800	0.00260793618903893	0.0364305526329839	0.0313312715903234	EFNA1/GRIN3A/DNM3	3
BP	GO:0072540	T-helper 17 cell lineage commitment	3/416	13/18800	0.00260793618903893	0.0364305526329839	0.0313312715903234	IL23A/SLAMF6/IRF4	3
BP	GO:0032874	positive regulation of stress-activated MAPK cascade	9/416	132/18800	0.00270335444539369	0.037618216859363	0.0323526953060071	GADD45B/TRAF5/TNIK/MMP8/CCR7/SLAMF1/RASGRP1/EDAR/CD27	9
BP	GO:0001562	response to protozoan	4/416	27/18800	0.00277061368267692	0.0381143737791829	0.0327794038262677	GBP4/BATF2/GBP6/IRF4	4
BP	GO:0002710	negative regulation of T cell mediated immunity	4/416	27/18800	0.00277061368267692	0.0381143737791829	0.0327794038262677	KLRD1/KLRC1/IL7R/SLAMF1	4
BP	GO:0010758	regulation of macrophage chemotaxis	4/416	27/18800	0.00277061368267692	0.0381143737791829	0.0327794038262677	SLAMF1/SLAMF8/CCL5/THBS1	4
BP	GO:0070304	positive regulation of stress-activated protein kinase signaling cascade	9/416	134/18800	0.00299123837995902	0.0409935623435292	0.0352555847334882	GADD45B/TRAF5/TNIK/MMP8/CCR7/SLAMF1/RASGRP1/EDAR/CD27	9
BP	GO:0032620	interleukin-17 production	5/416	45/18800	0.00305598299646677	0.0414102864465047	0.0356139788588834	OSM/IL23A/IFNG/SLAMF6/TNFSF4	5
BP	GO:0032660	regulation of interleukin-17 production	5/416	45/18800	0.00305598299646677	0.0414102864465047	0.0356139788588834	OSM/IL23A/IFNG/SLAMF6/TNFSF4	5
BP	GO:0046427	positive regulation of receptor signaling pathway via JAK-STAT	5/416	45/18800	0.00305598299646677	0.0414102864465047	0.0356139788588834	SOCS1/IL23A/IL7R/ADIPOR1/CCL5	5
BP	GO:0045576	mast cell activation	6/416	65/18800	0.00311115750225288	0.0420006262804138	0.036121687261035	BLK/PTGDR/PLSCR1/CNR2/GATA1/RASGRP1	6
BP	GO:0050727	regulation of inflammatory response	18/416	394/18800	0.0031355136786402	0.0420994236723703	0.0362066557200915	OSM/SOCS3/DNASE1L3/IL23A/KRT1/CD200R1/ETS1/MMP8/SNCA/IFNG/CCR7/CNR2/CAMK2N1/TNFSF4/SLAMF8/YES1/CCL5/PLCG1	18
BP	GO:0007260	tyrosine phosphorylation of STAT protein	7/416	87/18800	0.00315807522893768	0.0420994236723703	0.0362066557200915	OSM/SOCS3/SOCS1/IL23A/IFNG/JAK3/CCL5	7
BP	GO:0045069	regulation of viral genome replication	7/416	87/18800	0.00315807522893768	0.0420994236723703	0.0362066557200915	OAS3/PLSCR1/ISG15/IFITM3/CCL5/TRIM6/LTF	7
BP	GO:0002360	T cell lineage commitment	4/416	28/18800	0.00317665634675431	0.0420994236723703	0.0362066557200915	IL23A/TOX/SLAMF6/IRF4	4
BP	GO:0042104	positive regulation of activated T cell proliferation	4/416	28/18800	0.00317665634675431	0.0420994236723703	0.0362066557200915	IL23A/SLAMF1/JAK3/CD24	4
BP	GO:0016064	immunoglobulin mediated immune response	12/416	216/18800	0.00324115428499202	0.042646608121277	0.0366772493109001	CD19/CR2/SERPING1/C1QC/CD40LG/C2/C1QB/C1QA/TNFSF4/IGLL1/FCER2/CD27	12
BP	GO:0001771	immunological synapse formation	3/416	14/18800	0.0032650940988374	0.042646608121277	0.0366772493109001	CCR7/PRF1/CD6	3
BP	GO:0045059	positive thymic T cell selection	3/416	14/18800	0.0032650940988374	0.042646608121277	0.0366772493109001	TOX/CD3G/CD3D	3
BP	GO:1902043	positive regulation of extrinsic apoptotic signaling pathway via death domain receptors	3/416	14/18800	0.0032650940988374	0.042646608121277	0.0366772493109001	ATF3/MAL/THBS1	3
BP	GO:0001837	epithelial to mesenchymal transition	10/416	162/18800	0.00331490634056461	0.0431414789214487	0.0371028517330897	EPHA4/EFNA1/EPB41L5/EOMES/TGFBR3/ADIPOR1/PHLDB2/LEF1/AXIN2/DAB2	10
BP	GO:0030193	regulation of blood coagulation	6/416	66/18800	0.00335977841753095	0.0433551275777043	0.037286595420469	SERPING1/KRT1/PLAU/ALOX12/THBS1/PROS1	6
BP	GO:0071222	cellular response to lipopolysaccharide	12/416	217/18800	0.00336435350516376	0.0433551275777043	0.037286595420469	CD274/PDCD1LG2/GFI1/TNFSF4/GATA1/SPON2/PPBP/CCL5/PF4V1/CD6/CXCL5/LTF	12
BP	GO:0002709	regulation of T cell mediated immunity	7/416	88/18800	0.0033672722082186	0.0433551275777043	0.037286595420469	KLRD1/IL23A/KLRC1/IL7R/SLAMF1/TNFSF4/CLC	7
BP	GO:0019724	B cell mediated immunity	12/416	219/18800	0.00362210590485219	0.0464708480984228	0.0399662002789962	CD19/CR2/SERPING1/C1QC/CD40LG/C2/C1QB/C1QA/TNFSF4/IGLL1/FCER2/CD27	12
BP	GO:0002832	negative regulation of response to biotic stimulus	8/416	113/18800	0.00364590663943537	0.0466109195105201	0.040086665524162	SERPING1/KLRD1/OAS3/ISG15/KLRC1/CD96/SLAMF8/LTF	8
BP	GO:0097028	dendritic cell differentiation	5/416	47/18800	0.00370121028540694	0.0471513338471912	0.0405514366332947	BLK/BATF2/CCR7/GATA1/IRF4	5
BP	GO:1900046	regulation of hemostasis	6/416	68/18800	0.00390099920793029	0.0495221583659361	0.0425904105582343	SERPING1/KRT1/PLAU/ALOX12/THBS1/PROS1	6
BP	GO:0030852	regulation of granulocyte differentiation	3/416	15/18800	0.00401492319086597	0.0505383202449995	0.0434643375648711	TESC/C1QC/LEF1	3
BP	GO:0042976	activation of Janus kinase activity	3/416	15/18800	0.00401492319086597	0.0505383202449995	0.0434643375648711	SOCS1/IL23A/CCL5	3
BP	GO:0071900	regulation of protein serine/threonine kinase activity	17/416	372/18800	0.00402295086527359	0.0505383202449995	0.0434643375648711	FBXO7/EPHA4/FAM20A/CD40LG/PDGFD/LAX1/SNCA/IFNG/TRIB2/RASGRP1/TCL1A/CD24/PDE5A/TCL1B/DAB2/LTF/THBS1	17
BP	GO:1990748	cellular detoxification	8/416	115/18800	0.00405730702284287	0.0507935529710917	0.0436838446895775	GCH1/HP/HBG1/HBM/HBQ1/HBD/HBZ/MPO	8
BP	GO:0046328	regulation of JNK cascade	9/416	141/18800	0.00419394968033889	0.05232313773609	0.0449993294195345	GADD45B/TRAF5/TNIK/MMP8/CCR7/SLAMF1/RASGRP1/EDAR/CD27	9
BP	GO:1904892	regulation of receptor signaling pathway via STAT	8/416	116/18800	0.0042759798061121	0.0531632128471257	0.0457218169899344	SOCS3/SOCS1/IL23A/IL7R/ADIPOR1/IFNG/JAK3/CCL5	8
BP	GO:1904894	positive regulation of receptor signaling pathway via STAT	5/416	49/18800	0.00443862840977876	0.0549964300910259	0.0472984339556814	SOCS1/IL23A/IL7R/ADIPOR1/CCL5	5
BP	GO:0002275	myeloid cell activation involved in immune response	7/416	93/18800	0.00457584017811473	0.0565030367386317	0.0485941568762606	BLK/DNASE1L3/PTGDR/IFNG/SLAMF1/GATA1/RASGRP1	7
BP	GO:0002230	positive regulation of defense response to virus by host	4/416	31/18800	0.00463396105772681	0.056640780766404	0.0487126205072562	IL27/IL23A/AIM2/TRIM6	4
BP	GO:0034694	response to prostaglandin	4/416	31/18800	0.00463396105772681	0.056640780766404	0.0487126205072562	PTGDR/TGFBR3/CCR7/TNFSF4	4
BP	GO:0045577	regulation of B cell differentiation	4/416	31/18800	0.00463396105772681	0.056640780766404	0.0487126205072562	FCRL3/IKZF3/SLAMF8/CD27	4
CC	GO:0009897	external side of plasma membrane	40/427	455/19594	6.78118094465295e-14	2.57684875896812e-11	2.48405365130445e-11	MS4A1/CD79A/CD19/KLRC3/CD22/ABCB1/FASLG/SLC38A1/CD40LG/KLRD1/CD274/KLRC2/CCR3/KLRC1/CUBN/TGFBR3/CD200R1/IL7R/PDCD1LG2/CLEC4D/CCR7/CD8A/CXCR6/CXCR3/CD2/SLAMF1/SLAMF6/MS4A2/IL2RB/MPL/IGLL1/FCER2/CD248/CD24/CD3G/CD3D/CLEC4F/CD6/CD27/THBS1	40
CC	GO:0031838	haptoglobin-hemoglobin complex	6/427	11/19594	4.35644845873092e-08	8.27725207158876e-06	7.97917928230717e-06	HP/HBG1/HBM/HBQ1/HBD/HBZ	6
CC	GO:0005833	hemoglobin complex	5/427	12/19594	3.35175721437052e-06	0.000424555913820265	0.000409267196702084	HBG1/HBM/HBQ1/HBD/HBZ	5
CC	GO:0072562	blood microparticle	12/427	147/19594	9.31266678815678e-05	0.00861497996040633	0.00830474522499003	LGALS3BP/SERPING1/C1QC/HP/C1QB/KRT1/CFB/APOL1/SLC4A1/HBD/F13A1/PROS1	12
CC	GO:0071682	endocytic vesicle lumen	5/427	23/19594	0.000116813347398211	0.00861497996040633	0.00830474522499003	HP/GNLY/SPARC/LTF/MPO	5
CC	GO:0044194	cytolytic granule	4/427	13/19594	0.000136025999374837	0.00861497996040633	0.00830474522499003	GNLY/PRF1/GZMH/GZMB	4
MF	GO:0031720	haptoglobin binding	5/416	10/18410	1.32010270068505e-06	0.000378242920943831	0.000342594567317546	HBG1/HBM/HBQ1/HBD/HBZ	5
MF	GO:0140375	immune receptor activity	15/416	148/18410	1.35328415364519e-06	0.000378242920943831	0.000342594567317546	CR2/KLRF1/IL15RA/CD160/KLRD1/KLRC2/CCR3/KLRC1/CD200R1/IL7R/CCR7/CXCR6/CXCR3/IL2RB/MPL	15
MF	GO:0005344	oxygen carrier activity	5/416	14/18410	9.73076083156066e-06	0.00171002868784664	0.00154886319339843	HBG1/HBM/HBQ1/HBD/HBZ	5
MF	GO:0019865	immunoglobulin binding	6/416	24/18410	1.22363412368275e-05	0.00171002868784664	0.00154886319339843	MS4A1/CD22/FCER1A/MS4A2/FCER2/FCGR3B	6
MF	GO:0004715	non-membrane spanning protein tyrosine kinase activity	7/416	45/18410	6.1830535999955e-05	0.00691265392479497	0.00626115532967965	BLK/TXK/ITK/BMX/JAK3/MATK/YES1	7
MF	GO:0023023	MHC protein complex binding	6/416	36/18410	0.000140793259742897	0.0131172386993799	0.0118809750765497	MS4A1/CD160/KLRD1/KLRC2/KLRC1/CD8A	6
MF	GO:0004252	serine-type endopeptidase activity	13/416	174/18410	0.000168637860836421	0.0134669377439371	0.0121977159492208	HP/C2/GZMK/CFB/MMP8/PRSS23/PRSS33/PLAU/TMPRSS9/GZMA/GZMH/GZMB/LTF	13
MF	GO:0019825	oxygen binding	6/416	39/18410	0.000222734411586635	0.0155635670096161	0.0140967436806805	HBG1/HBM/HBQ1/CBS/HBD/HBZ	6
MF	GO:0016684	oxidoreductase activity, acting on peroxide as acceptor	7/416	56/18410	0.000255299115865507	0.0158569117520909	0.0143624414890419	SESN3/HBG1/HBM/HBQ1/HBD/HBZ/MPO	7
MF	GO:0005125	cytokine activity	15/416	235/18410	0.000309775748313388	0.0173164643307184	0.0156844352567094	OSM/FAM3C/IL27/FASLG/CD40LG/SECTM1/IL23A/IFNG/TNFSF4/PPBP/CCL5/PF4V1/CXCL5/SCGB3A1/CMTM2	15
MF	GO:0008236	serine-type peptidase activity	13/416	191/18410	0.000418670433227907	0.021047953340164	0.0190642417034534	HP/C2/GZMK/CFB/MMP8/PRSS23/PRSS33/PLAU/TMPRSS9/GZMA/GZMH/GZMB/LTF	13
MF	GO:0030246	carbohydrate binding	16/416	270/18410	0.000451834418751285	0.021047953340164	0.0190642417034534	FBXO6/KLRC3/CD22/KLRF1/KLRD1/KLRC2/KRT1/KLRC1/KLRG1/CLEC4D/KLRB1/FCER2/CD248/CLC/CLEC1B/CLEC4F	16
MF	GO:0017171	serine hydrolase activity	13/416	195/18410	0.000509978082932689	0.0219290575661056	0.0198623042826416	HP/C2/GZMK/CFB/MMP8/PRSS23/PRSS33/PLAU/TMPRSS9/GZMA/GZMH/GZMB/LTF	13
MF	GO:0019887	protein kinase regulator activity	13/416	207/18410	0.000891074537025498	0.0355793332998038	0.0322260791209973	SOCS3/TESC/FAM20A/SOCS1/CD40LG/SNCA/TRIB2/CAMK2N1/TCL1A/CD24/TCL1B/CCL5/LTF	13
MF	GO:0004601	peroxidase activity	6/416	52/18410	0.00108588668689604	0.0404673771983256	0.0366534383436487	HBG1/HBM/HBQ1/HBD/HBZ/MPO	6
MF	GO:0005126	cytokine receptor binding	15/416	272/18410	0.00139339510153787	0.0486817413599794	0.0440936213052445	OSM/IL27/FASLG/CD40LG/IL23A/TRAF5/TGFBR3/IFNG/JAK3/TNFSF4/PPBP/CCL5/PLCG1/PF4V1/CXCL5	15
MF	GO:0004896	cytokine receptor activity	8/416	97/18410	0.00159215721409434	0.0502615551602723	0.0455245420056322	IL15RA/CCR3/IL7R/CCR7/CXCR6/CXCR3/IL2RB/MPL	8
MF	GO:0016493	C-C chemokine receptor activity	4/416	23/18410	0.00161844005882809	0.0502615551602723	0.0455245420056322	CCR3/CCR7/CXCR6/CXCR3	4
